# Supplementary material for: Use of Serum MicroRNAs as Biomarker for Hepatobiliary Diseases in Dogs
Source: PubMed Central journal article supplement — J Vet Intern Med. 2016 Nov 11;30(6):1816–23. doi: 10.1111/jvim.14602 (PMC5115189; doi:10.1111/jvim.14602), 2016-11-11
Supplement: JVIM-30-1816-s001.pdf [file JVIM-30-1816-s001.pdf]

**Supplementary Table 2.** Increase in microRNA concentrations in dogs with different hepatobiliary diseases compared to control dogs.

|                 | miR-21                                  | miR-122                                                  | miR-126                                | miR-148a                   | miR-200c                                | miR-222                                |
|-----------------|-----------------------------------------|----------------------------------------------------------|----------------------------------------|----------------------------|-----------------------------------------|----------------------------------------|
| AH<br>(n = 6)   | 6 (CI: 1-27)<br>P=0.095                 | <b>11 (CI: 2-63)</b><br><b>P=0.041</b>                   | 3 (CI: 0.6-11)<br>P=0.329              | 0.4 (CI: 0-2)<br>P=0.419   | 1 (CI: 0.1-13)<br>P=0.985               | 3 (CI: 0.6-16)<br>P=0.285              |
| CH<br>(n = 6)   | <b>19 (CI: 4-103)</b><br><b>P=0.008</b> | <b>32 (CI: 5-190)</b><br><b>P=0.006</b>                  | <b>22 (CI: 5-91)</b><br><b>P=0.002</b> | 2 (CI: 0.3-20)<br>P=0.609  | 3 (CI: 0.2-36)<br>P=0.610               | 5 (CI: 1-29)<br>P=0.133                |
| MU<br>(n = 5)   | <b>26 (CI: 5-141)</b><br><b>P=0.005</b> | <b>267</b><br><b>(CI: 40-1,768)</b><br><b>P&lt;0.001</b> | 4 (CI: 0.8-17)<br>P=0.182              | 4 (CI: 0.6-23)<br>P=0.268  | 8 (CI: 0.7-85)<br>P=0.208               | <b>13 (CI: 2-70)</b><br><b>P=0.025</b> |
| BI<br>(n = 6)   | 1 (CI: 0.3-6)<br>P=0.776                | <b>12 (CI: 2-69)</b><br><b>P=0.037</b>                   | 0.4 (CI: 0.1-2)<br>P=0.336             | 0.2 (CI: 0-0.9)<br>P=0.099 | 0.6 (CI: 0-6)<br>P=0.713                | 0.2 (CI: 0-1)<br>P=0.184               |
| CPSS<br>(n = 5) | 7 (CI: 1-35)<br>P=0.095                 | 2 (CI: 0.3-11)<br>P=0.706                                | 3 (CI: 0.6-12)<br>P=0.329              | 0.7 (CI: 0.1-4)<br>P=0.745 | 5 (CI: 0.4-53)<br>P=0.342               | 2 (CI: 0.3-12)<br>P=0.598              |
| HCA<br>(n = 6)  | 0.8 (CI: 0.2-4)<br>P=0.811              | 2 (CI: 0.4-14)<br>P=0.460                                | 0.4 (CI: 0.1-2)<br>P=0.380             | 0.1 (CI: 0-0.7)<br>P=0.061 | 0.4 (CI: 0-6)<br>P=0.635                | 0.2 (CI: 0-1)<br>P=0.193               |
| HCC<br>(n = 6)  | <b>21 (CI: 4-104)</b><br><b>P=0.004</b> | <b>20 (CI: 3-120)</b><br><b>P=0.011</b>                  | 1 (CI: 0.4-6)<br>P=0.670               | 7 (CI: 1-36)<br>P=0.095    | <b>35 (CI: 3-382)</b><br><b>P=0.035</b> | <b>9 (CI: 2-42)</b><br><b>P=0.041</b>  |
| L<br>(n = 6)    | <b>10 (CI: 2-56)</b><br><b>P=0.038</b>  | <b>30 (CI: 5-177)</b><br><b>P=0.004</b>                  | 3 (CI: 0.8-13)<br>P=0.230              | 0.5 (CI: 0-3)<br>P=0.621   | 1 (CI: 0.1-13)<br>P=0.843               | 3 (CI: 0.5-14)<br>P=0.388              |

Statistical significant results after correction for multiple testing ( $P < 0.05$ ) are depicted in bold. AH, acute hepatitis; BI, Other biliary diseases (cholangitis or extra-hepatic bile duct obstruction); CH, chronic hepatitis; CI, 95% confidence interval; CPSS, congenital portosystemic shunts; HCA, hepatocellular adenoma; HCC, hepatocellular carcinoma; L, lymphoma; MU, mucoceles.
